# Supplementary material
Source: publisher figshare collection journal article supplement (https://acs.figshare.com/ndownloader/files/4014328)
Supplement: Supplementary file 1 [file 4014328]

 
 
# SUBMISSION DETAILS

_publ_contact_author_name             'Takuji Hirose'
_publ_contact_author_email            'hirose@apc.saitama-u.ac.jp'
_publ_contact_author_address          '255 Shimo-Okubo,Sakura-ku,Saitama,Japan'
_publ_contact_author_fax              '+81-48-858-9548'
_publ_contact_author_phone            '+81-48-858-9548'
_publ_contact_letter
;
    ENTER TEXT OF LETTER
;
_publ_requested_journal               'J. Org. Chem.'

#============================================================================== 

# TITLE AND AUTHOR LIST

_publ_section_title
;
Solvent-induced reversed stereoselectivity in reciprocal
resolutions of mandelic acid and erythro-2-amino-1,2-
diphenylethanol
;
_publ_section_title_footnote
;
    ENTER FOOTNOTE TO TITLE OF PAPER
;
loop_
_publ_author_name
_publ_author_footnote
_publ_author_address

' Hiroaki Shitara'
;
  Technical Support Center,
  Saitama University
;
;
  255 Shimo-Okubo,Sakura-ku,Saitama,Japan
;
;
  Toshiki Shintani
;
;
  Saitama Prefectural Koshigayakita Senior High School
;
;
  Ohdomari,Koshigaya City,Saitama,Japan
;
;
  Koichi Kodama
;
;
  Dept. of Applied Chemistry, Graduate School of Engineering,
  Saitama University
;
;
  255 Shimo-Okubo,Sakura-ku,Saitama,Japan
;
;
  Takuji Hirose 
;
;
  Dept. of Applied Chemistry, Graduate School of Engineering,
  Saitama University
;
;
  255 Shimo-Okubo,Sakura-ku,Saitama,Japan
;


_publ_section_synopsis
;
  ENTER SYNOPSIS
; 


#=====================================================================

data_(S)-1_(1R,2S)-2_1-BuOH 
 
#=====================================================================  
 
_audit_creation_method            SHELXL-97 
_chemical_name_systematic 
; 
 ? 
; 
_chemical_name_common             ? 
_chemical_melting_point           ? 
_chemical_formula_moiety          ? 
_chemical_formula_sum 
 'C26 H33 N O5' 
_chemical_formula_weight          439.53 
 
loop_ 
 _atom_type_symbol 
 _atom_type_description 
 _atom_type_scat_dispersion_real 
 _atom_type_scat_dispersion_imag 
 _atom_type_scat_source 
 'C'  'C'   0.0033   0.0016 
 'International Tables Vol C Tables 4.2.6.8 and 6.1.1.4' 
 'H'  'H'   0.0000   0.0000 
 'International Tables Vol C Tables 4.2.6.8 and 6.1.1.4' 
 'N'  'N'   0.0061   0.0033 
 'International Tables Vol C Tables 4.2.6.8 and 6.1.1.4' 
 'O'  'O'   0.0106   0.0060 
 'International Tables Vol C Tables 4.2.6.8 and 6.1.1.4' 
 
_symmetry_cell_setting            Monoclinic 
_symmetry_space_group_name_H-M    P21 
 
loop_ 
 _symmetry_equiv_pos_as_xyz 
 'x, y, z' 
 '-x, y+1/2, -z' 
 
_cell_length_a                    16.429(4) 
_cell_length_b                    5.8300(14) 
_cell_length_c                    25.749(6) 
_cell_angle_alpha                 90.00 
_cell_angle_beta                  101.226(3) 
_cell_angle_gamma                 90.00 
_cell_volume                      2419.0(10) 
_cell_formula_units_Z             4 
_cell_measurement_temperature     150(2) 
_cell_measurement_reflns_used     ? 
_cell_measurement_theta_min       ? 
_cell_measurement_theta_max       ? 
 
_exptl_crystal_description        needle 
_exptl_crystal_colour             colorless 
_exptl_crystal_size_max           0.57 
_exptl_crystal_size_mid           0.04 
_exptl_crystal_size_min           0.02 
_exptl_crystal_density_meas       ? 
_exptl_crystal_density_diffrn     1.207 
_exptl_crystal_density_method     'not measured' 
_exptl_crystal_F_000              944 
_exptl_absorpt_coefficient_mu     0.083 
_exptl_absorpt_correction_type    'multi-scan' 
_exptl_absorpt_correction_T_min   0.9542 
_exptl_absorpt_correction_T_max   0.9983 
_exptl_absorpt_process_details    ? 
_chemical_absolute_configuration  rm
 
_exptl_special_details 
; 
 ? 
; 
 
_diffrn_ambient_temperature       150(2) 
_diffrn_radiation_wavelength      0.71073 
_diffrn_radiation_type            MoK\a 
_diffrn_radiation_source          'fine-focus sealed tube' 
_diffrn_radiation_monochromator   graphite 
_diffrn_measurement_device_type   CCD 
_diffrn_measurement_method        \w 
_diffrn_detector_area_resol_mean  ? 
_diffrn_standards_number          ? 
_diffrn_standards_interval_count  ? 
_diffrn_standards_interval_time   ? 
_diffrn_standards_decay_%         ? 
_diffrn_reflns_number             11446 
_diffrn_reflns_av_R_equivalents   0.1138 
_diffrn_reflns_av_sigmaI/netI     0.1300 
_diffrn_reflns_limit_h_min        -19 
_diffrn_reflns_limit_h_max        12 
_diffrn_reflns_limit_k_min        -6 
_diffrn_reflns_limit_k_max        6 
_diffrn_reflns_limit_l_min        -29 
_diffrn_reflns_limit_l_max        30 
_diffrn_reflns_theta_min          1.26 
_diffrn_reflns_theta_max          25.00 
_reflns_number_total              7607 
_reflns_number_gt                 4860 
_reflns_threshold_expression      >2sigma(I) 
 
_computing_data_collection        ? 
_computing_cell_refinement        ? 
_computing_data_reduction         ? 
_computing_structure_solution     'SHELXS-97 (Sheldrick, 1990)' 
_computing_structure_refinement   'SHELXL-97 (Sheldrick, 1997)' 
_computing_molecular_graphics     ? 
_computing_publication_material   ? 
 
_refine_special_details 
; 
 Refinement of F^2^ against ALL reflections.  The weighted R-factor wR and 
 goodness of fit S are based on F^2^, conventional R-factors R are based 
 on F, with F set to zero for negative F^2^. The threshold expression of 
 F^2^ > 2sigma(F^2^) is used only for calculating R-factors(gt) etc. and is 
 not relevant to the choice of reflections for refinement.  R-factors based 
 on F^2^ are statistically about twice as large as those based on F, and R- 
 factors based on ALL data will be even larger. 
; 
 
_refine_ls_structure_factor_coef  Fsqd  
_refine_ls_matrix_type            full 
_refine_ls_weighting_scheme       calc  
_refine_ls_weighting_details 
 'calc w=1/[\s^2^(Fo^2^)+(0.0731P)^2^+0.0000P] where P=(Fo^2^+2Fc^2^)/3' 
_atom_sites_solution_primary      direct 
_atom_sites_solution_secondary    difmap 
_atom_sites_solution_hydrogens    geom 
_refine_ls_hydrogen_treatment     mixed 
_refine_ls_extinction_method      none 
_refine_ls_extinction_coef        ? 
_refine_ls_abs_structure_details 
 'Flack H D (1983), Acta Cryst. A39, 876-881' 
_refine_ls_abs_structure_Flack    -0.6(15) 
_refine_ls_number_reflns          7607 
_refine_ls_number_parameters      596 
_refine_ls_number_restraints      1 
_refine_ls_R_factor_all           0.0996 
_refine_ls_R_factor_gt            0.0611 
_refine_ls_wR_factor_ref          0.1620 
_refine_ls_wR_factor_gt           0.1410 
_refine_ls_goodness_of_fit_ref    0.928 
_refine_ls_restrained_S_all       0.928 
_refine_ls_shift/su_max           0.000 
_refine_ls_shift/su_mean          0.000 
 
loop_ 
 _atom_site_label 
 _atom_site_type_symbol 
 _atom_site_fract_x 
 _atom_site_fract_y 
 _atom_site_fract_z 
 _atom_site_U_iso_or_equiv 
 _atom_site_adp_type 
 _atom_site_occupancy 
 _atom_site_symmetry_multiplicity 
 _atom_site_calc_flag 
 _atom_site_refinement_flags 
 _atom_site_disorder_assembly 
 _atom_site_disorder_group 
O1 O 0.02181(17) -0.1252(6) 0.53682(11) 0.0329(7) Uani 1 1 d . . . 
O2 O 0.00264(18) -0.0656(5) 0.95489(11) 0.0370(8) Uani 1 1 d . . . 
O3 O 0.25302(18) 0.2438(5) 0.55235(13) 0.0373(8) Uani 1 1 d . . . 
H1 H 0.2067 0.2979 0.5551 0.056 Uiso 1 1 calc R . . 
O4 O 0.10764(16) -0.5261(5) 0.54337(10) 0.0299(7) Uani 1 1 d . . . 
H2 H 0.0786 -0.5498 0.5132 0.045 Uiso 1 1 calc R . . 
O5 O 0.21803(18) -0.4681(5) 0.93199(13) 0.0354(8) Uani 1 1 d . . . 
H3 H 0.1722 -0.5051 0.9394 0.053 Uiso 1 1 calc R . . 
O6 O 0.07900(17) 0.3492(6) 0.95821(12) 0.0371(8) Uani 1 1 d . . . 
H4 H 0.0761 0.3478 0.9904 0.056 Uiso 1 1 calc R . . 
N1 N 0.17159(19) -0.0957(7) 1.00092(13) 0.0306(9) Uani 1 1 d . . . 
H64 H 0.1152 -0.0586 0.9768 0.046 Uiso 1 1 calc R . . 
H65 H 0.1833 0.0210 1.0317 0.046 Uiso 1 1 calc R . . 
H66 H 0.1699 -0.2593 1.0161 0.046 Uiso 1 1 calc R . . 
O7 O -0.07055(18) -0.2855(6) 0.57894(12) 0.0393(8) Uani 1 1 d . . . 
C1 C 0.0543(3) -0.4871(8) 0.58067(16) 0.0274(10) Uani 1 1 d . . . 
H5 H 0.0192 -0.6263 0.5819 0.033 Uiso 1 1 calc R . . 
N2 N 0.1645(2) -0.1193(9) 0.48659(17) 0.0342(10) Uani 1 1 d . . . 
H6 H 0.163(3) -0.231(10) 0.459(2) 0.052(16) Uiso 1 1 d . . . 
H7 H 0.158(3) 0.024(9) 0.4775(17) 0.034(15) Uiso 1 1 d . . . 
H8 H 0.120(4) -0.226(11) 0.506(2) 0.09(2) Uiso 1 1 d . . . 
C2 C 0.2511(2) -0.1434(8) 0.51873(15) 0.0270(10) Uani 1 1 d . . . 
H9 H 0.2582 -0.3057 0.5313 0.032 Uiso 1 1 calc R . . 
O8 O 0.7942(2) -0.2864(6) 0.91822(12) 0.0503(9) Uani 1 1 d . . . 
H10 H 0.8231 -0.1666 0.9226 0.075 Uiso 1 1 calc R . . 
C3 C 0.3864(3) 0.0199(8) 1.00677(16) 0.0295(11) Uani 1 1 d . . . 
H11 H 0.3778 0.1587 0.9871 0.035 Uiso 1 1 calc R . . 
C4 C 0.2172(3) -0.2323(8) 0.91933(17) 0.0300(11) Uani 1 1 d . . . 
H12 H 0.1603 -0.1902 0.9001 0.036 Uiso 1 1 calc R . . 
C5 C 0.1116(3) -0.2472(8) 0.66363(16) 0.0307(10) Uani 1 1 d . . . 
H13 H 0.0767 -0.1230 0.6496 0.037 Uiso 1 1 calc R . . 
C6 C 0.3223(2) -0.1361(8) 1.00374(15) 0.0238(10) Uani 1 1 d . . . 
C7 C 0.2789(3) -0.1851(8) 0.88310(16) 0.0289(11) Uani 1 1 d . . . 
C8 C 0.3802(3) -0.2481(9) 0.48737(16) 0.0334(11) Uani 1 1 d . . . 
H14 H 0.3823 -0.3827 0.5084 0.040 Uiso 1 1 calc R . . 
C9 C 0.2393(2) -0.0815(8) 0.96905(16) 0.0277(10) Uani 1 1 d . . . 
H15 H 0.2417 0.0809 0.9569 0.033 Uiso 1 1 calc R . . 
C10 C -0.0022(2) -0.2816(8) 0.56376(15) 0.0265(10) Uani 1 1 d . . . 
C11 C 0.1611(3) -0.6327(9) 0.65698(16) 0.0331(11) Uani 1 1 d . . . 
H16 H 0.1593 -0.7741 0.6384 0.040 Uiso 1 1 calc R . . 
C12 C 0.3354(3) -0.0409(8) 0.60818(16) 0.0271(10) Uani 1 1 d . . . 
C13 C 0.1094(2) -0.4519(8) 0.63525(16) 0.0268(10) Uani 1 1 d . . . 
C14 C 0.2573(3) 0.0117(8) 0.56775(17) 0.0290(10) Uani 1 1 d . . . 
H17 H 0.2085 -0.0217 0.5844 0.035 Uiso 1 1 calc R . . 
C15 C 0.4638(3) -0.0254(8) 1.03862(16) 0.0330(11) Uani 1 1 d . . . 
H18 H 0.5076 0.0828 1.0407 0.040 Uiso 1 1 calc R . . 
C16 C -0.0035(3) 0.3274(8) 0.92625(16) 0.0316(11) Uani 1 1 d . . . 
H19 H -0.0385 0.4544 0.9360 0.038 Uiso 1 1 calc R . . 
C17 C 0.3978(3) -0.2957(9) 0.84735(17) 0.0368(12) Uani 1 1 d . . . 
H20 H 0.4395 -0.4052 0.8445 0.044 Uiso 1 1 calc R . . 
C18 C 0.4138(3) -0.3826(9) 1.06429(17) 0.0368(12) Uani 1 1 d . . . 
H21 H 0.4230 -0.5215 1.0838 0.044 Uiso 1 1 calc R . . 
C19 C 0.3157(2) -0.0958(8) 0.48615(16) 0.0277(10) Uani 1 1 d . . . 
C20 C -0.0419(3) 0.1041(8) 0.93716(17) 0.0327(11) Uani 1 1 d . . . 
C21 C 0.4402(3) -0.0150(9) 0.42855(18) 0.0395(13) Uani 1 1 d . . . 
H22 H 0.4829 0.0118 0.4091 0.047 Uiso 1 1 calc R . . 
C22 C 0.0026(3) 0.3573(9) 0.86880(18) 0.0365(12) Uani 1 1 d . . . 
C23 C 0.4413(3) -0.2098(9) 0.45893(18) 0.0401(13) Uani 1 1 d . . . 
H23 H 0.4847 -0.3185 0.4602 0.048 Uiso 1 1 calc R . . 
C24 C 0.3767(3) 0.1402(9) 0.42673(18) 0.0378(12) Uani 1 1 d . . . 
H24 H 0.3756 0.2757 0.4061 0.045 Uiso 1 1 calc R . . 
C25 C 0.3142(3) 0.1000(9) 0.45475(17) 0.0388(12) Uani 1 1 d . . . 
H25 H 0.2700 0.2066 0.4526 0.047 Uiso 1 1 calc R . . 
C26 C 0.3344(3) 0.0686(9) 0.82512(17) 0.0389(12) Uani 1 1 d . . . 
H26 H 0.3326 0.2108 0.8069 0.047 Uiso 1 1 calc R . . 
C27 C 0.4768(3) -0.2264(9) 1.06698(17) 0.0354(12) Uani 1 1 d . . . 
H27 H 0.5295 -0.2570 1.0885 0.042 Uiso 1 1 calc R . . 
C28 C 0.2146(3) -0.6076(9) 0.70500(18) 0.0407(12) Uani 1 1 d . . . 
H28 H 0.2510 -0.7288 0.7189 0.049 Uiso 1 1 calc R . . 
C29 C 0.4791(3) -0.1451(10) 0.68074(19) 0.0470(14) Uani 1 1 d . . . 
H29 H 0.5281 -0.1800 0.7057 0.056 Uiso 1 1 calc R . . 
C30 C 0.2763(3) 0.0228(8) 0.85616(17) 0.0361(12) Uani 1 1 d . . . 
H30 H 0.2349 0.1330 0.8591 0.043 Uiso 1 1 calc R . . 
C31 C 0.3947(3) -0.0895(9) 0.82032(17) 0.0352(11) Uani 1 1 d . . . 
H31 H 0.4339 -0.0575 0.7986 0.042 Uiso 1 1 calc R . . 
C32 C 0.3356(3) -0.3375(8) 1.03267(17) 0.0341(11) Uani 1 1 d . . . 
H32 H 0.2918 -0.4452 1.0311 0.041 Uiso 1 1 calc R . . 
C33 C 0.4017(3) 0.1106(9) 0.61627(18) 0.0380(12) Uani 1 1 d . . . 
H33 H 0.3982 0.2512 0.5973 0.046 Uiso 1 1 calc R . . 
C34 C 0.4737(3) 0.0547(10) 0.65252(18) 0.0485(14) Uani 1 1 d . . . 
H34 H 0.5196 0.1569 0.6577 0.058 Uiso 1 1 calc R . . 
C35 C 0.1643(3) -0.2252(9) 0.71189(17) 0.0399(12) Uani 1 1 d . . . 
H35 H 0.1661 -0.0855 0.7311 0.048 Uiso 1 1 calc R . . 
C36 C 0.3407(2) -0.3420(8) 0.87826(16) 0.0298(11) Uani 1 1 d . . . 
H36 H 0.3434 -0.4837 0.8967 0.036 Uiso 1 1 calc R . . 
C37 C 0.3419(3) -0.2401(9) 0.63640(18) 0.0422(12) Uani 1 1 d . . . 
H37 H 0.2963 -0.3435 0.6310 0.051 Uiso 1 1 calc R . . 
C38 C 0.2148(3) -0.4070(9) 0.73251(18) 0.0421(13) Uani 1 1 d . . . 
H38 H 0.2501 -0.3919 0.7663 0.051 Uiso 1 1 calc R . . 
C39 C 0.4130(3) -0.2961(10) 0.67279(18) 0.0460(13) Uani 1 1 d . . . 
H39 H 0.4162 -0.4362 0.6919 0.055 Uiso 1 1 calc R . . 
C40 C 0.6901(4) -0.4674(13) 0.8529(2) 0.082(2) Uani 1 1 d . . . 
H40 H 0.6547 -0.4674 0.8798 0.098 Uiso 1 1 calc R . . 
H41 H 0.7221 -0.6124 0.8575 0.098 Uiso 1 1 calc R . . 
C41 C 0.0171(4) 0.4230(15) 0.7645(2) 0.072(2) Uani 1 1 d . . . 
H42 H 0.0244 0.4487 0.7293 0.086 Uiso 1 1 calc R . . 
C42 C 0.5796(5) -0.6701(14) 0.7891(3) 0.097(2) Uani 1 1 d . . . 
H43 H 0.6111 -0.8102 0.7856 0.145 Uiso 1 1 calc R . . 
H44 H 0.5424 -0.6370 0.7553 0.145 Uiso 1 1 calc R . . 
H45 H 0.5469 -0.6916 0.8167 0.145 Uiso 1 1 calc R . . 
C43 C 0.0331(4) 0.1941(15) 0.8421(2) 0.094(3) Uani 1 1 d . . . 
H46 H 0.0502 0.0526 0.8591 0.112 Uiso 1 1 calc R . . 
C44 C 0.0406(4) 0.2269(18) 0.7889(3) 0.102(3) Uani 1 1 d . . . 
H47 H 0.0626 0.1079 0.7705 0.122 Uiso 1 1 calc R . . 
C45 C 0.6367(5) -0.4796(16) 0.8033(3) 0.122(4) Uani 1 1 d . . . 
H48 H 0.6720 -0.4728 0.7762 0.146 Uiso 1 1 calc R . . 
H49 H 0.6029 -0.3378 0.7993 0.146 Uiso 1 1 calc R . . 
O9 O -0.12132(18) 0.0973(6) 0.92774(14) 0.0486(9) Uani 1 1 d . . . 
C46 C -0.0234(7) 0.5474(14) 0.8429(2) 0.130(4) Uani 1 1 d . . . 
H50 H -0.0472 0.6640 0.8610 0.156 Uiso 1 1 calc R . . 
C47 C -0.0173(9) 0.5847(15) 0.7905(3) 0.172(6) Uani 1 1 d . . . 
H51 H -0.0374 0.7232 0.7732 0.206 Uiso 1 1 calc R . . 
O10 O 0.1492(2) 0.5877(7) 0.40377(13) 0.0616(11) Uani 1 1 d . . . 
H52 H 0.1225 0.4694 0.4087 0.092 Uiso 1 1 calc R . . 
C48 C 0.1224(4) 0.6653(13) 0.3500(2) 0.082(2) Uani 1 1 d . . . 
H53 H 0.0748 0.7706 0.3488 0.098 Uiso 1 1 calc R . . 
H54 H 0.1024 0.5311 0.3276 0.098 Uiso 1 1 calc R . . 
C49 C 0.7470(6) -0.2906(17) 0.8660(3) 0.138(4) Uani 1 1 d . . . 
H55 H 0.7165 -0.1437 0.8597 0.166 Uiso 1 1 calc R . . 
H56 H 0.7862 -0.2966 0.8413 0.166 Uiso 1 1 calc R . . 
C50 C 0.1856(7) 0.782(2) 0.3272(4) 0.169(5) Uani 1 1 d . . . 
H57 H 0.1589 0.8335 0.2912 0.203 Uiso 1 1 calc R . . 
H58 H 0.2017 0.9226 0.3484 0.203 Uiso 1 1 calc R . . 
C51 C 0.2503(10) 0.485(3) 0.2840(5) 0.242(9) Uani 1 1 d . . . 
H59 H 0.3044 0.4150 0.2835 0.363 Uiso 1 1 calc R . . 
H60 H 0.2273 0.5480 0.2489 0.363 Uiso 1 1 calc R . . 
H61 H 0.2125 0.3684 0.2931 0.363 Uiso 1 1 calc R . . 
C52 C 0.2601(6) 0.666(3) 0.3226(5) 0.184(6) Uani 1 1 d . . . 
H62 H 0.2849 0.6004 0.3576 0.221 Uiso 1 1 calc R . . 
H63 H 0.2998 0.7796 0.3134 0.221 Uiso 1 1 calc R . . 
 
loop_ 
 _atom_site_aniso_label 
 _atom_site_aniso_U_11 
 _atom_site_aniso_U_22 
 _atom_site_aniso_U_33 
 _atom_site_aniso_U_23 
 _atom_site_aniso_U_13 
 _atom_site_aniso_U_12 
O1 0.0261(16) 0.0386(19) 0.0320(16) 0.0048(16) 0.0009(13) 0.0039(15) 
O2 0.0326(17) 0.037(2) 0.0388(18) 0.0022(16) -0.0007(15) -0.0007(16) 
O3 0.0268(17) 0.0325(19) 0.0545(19) 0.0009(17) 0.0122(16) 0.0039(15) 
O4 0.0226(15) 0.044(2) 0.0211(14) -0.0024(15) -0.0007(13) 0.0021(14) 
O5 0.0261(17) 0.0292(18) 0.0498(19) -0.0006(16) 0.0047(16) -0.0075(14) 
O6 0.0276(16) 0.049(2) 0.0322(16) -0.0017(17) -0.0003(14) -0.0069(16) 
N1 0.0225(19) 0.035(2) 0.034(2) 0.0000(18) 0.0040(16) 0.0012(18) 
O7 0.0226(16) 0.049(2) 0.0458(18) 0.0014(17) 0.0065(15) 0.0000(15) 
C1 0.024(2) 0.031(3) 0.028(2) -0.003(2) 0.006(2) -0.003(2) 
N2 0.022(2) 0.034(3) 0.042(3) 0.008(2) -0.0043(18) -0.002(2) 
C2 0.022(2) 0.032(3) 0.027(2) 0.005(2) 0.0025(18) 0.002(2) 
O8 0.046(2) 0.055(2) 0.0436(19) 0.0024(19) -0.0071(17) -0.0179(18) 
C3 0.027(2) 0.036(3) 0.025(2) 0.005(2) 0.004(2) -0.002(2) 
C4 0.022(2) 0.030(3) 0.035(2) 0.002(2) -0.001(2) 0.005(2) 
C5 0.034(3) 0.025(3) 0.030(2) 0.001(2) -0.001(2) -0.002(2) 
C6 0.019(2) 0.026(2) 0.027(2) -0.001(2) 0.0054(18) 0.001(2) 
C7 0.022(2) 0.038(3) 0.022(2) -0.001(2) -0.0069(18) -0.001(2) 
C8 0.030(2) 0.036(3) 0.032(2) 0.005(2) 0.001(2) 0.004(2) 
C9 0.019(2) 0.031(3) 0.031(2) 0.002(2) 0.0018(19) 0.0005(19) 
C10 0.020(2) 0.037(3) 0.021(2) -0.005(2) -0.0003(19) -0.003(2) 
C11 0.037(3) 0.034(3) 0.028(2) 0.000(2) 0.005(2) 0.001(2) 
C12 0.025(2) 0.031(3) 0.028(2) -0.003(2) 0.0108(19) 0.001(2) 
C13 0.021(2) 0.032(3) 0.027(2) 0.004(2) 0.0035(19) -0.0029(19) 
C14 0.020(2) 0.029(3) 0.040(3) 0.002(2) 0.009(2) -0.003(2) 
C15 0.028(3) 0.037(3) 0.034(3) 0.004(2) 0.005(2) -0.006(2) 
C16 0.027(2) 0.037(3) 0.029(2) 0.000(2) 0.000(2) -0.003(2) 
C17 0.028(3) 0.043(3) 0.038(3) 0.001(2) 0.003(2) 0.006(2) 
C18 0.038(3) 0.042(3) 0.029(2) 0.006(2) 0.002(2) 0.011(2) 
C19 0.023(2) 0.029(3) 0.030(2) -0.003(2) 0.0022(19) -0.006(2) 
C20 0.035(3) 0.036(3) 0.029(2) -0.006(2) 0.012(2) -0.005(2) 
C21 0.033(3) 0.047(3) 0.043(3) -0.007(3) 0.017(2) -0.002(2) 
C22 0.023(2) 0.050(3) 0.033(3) -0.003(3) -0.002(2) -0.010(2) 
C23 0.031(3) 0.050(3) 0.041(3) -0.004(3) 0.008(2) 0.007(2) 
C24 0.037(3) 0.035(3) 0.043(3) 0.005(2) 0.010(2) 0.000(2) 
C25 0.029(2) 0.047(3) 0.040(3) 0.006(3) 0.006(2) 0.005(2) 
C26 0.050(3) 0.039(3) 0.025(2) 0.002(2) 0.001(2) -0.007(3) 
C27 0.018(2) 0.051(3) 0.034(3) -0.001(2) -0.003(2) 0.000(2) 
C28 0.039(3) 0.045(3) 0.035(3) 0.010(3) -0.001(2) 0.005(3) 
C29 0.035(3) 0.066(4) 0.034(3) 0.004(3) -0.007(2) 0.008(3) 
C30 0.033(3) 0.036(3) 0.035(3) -0.004(2) -0.005(2) 0.003(2) 
C31 0.032(3) 0.047(3) 0.026(2) -0.004(2) 0.004(2) -0.008(2) 
C32 0.026(2) 0.038(3) 0.036(3) -0.001(2) 0.001(2) -0.004(2) 
C33 0.034(3) 0.042(3) 0.038(3) 0.003(2) 0.006(2) -0.002(2) 
C34 0.037(3) 0.065(4) 0.039(3) -0.001(3) -0.004(2) -0.015(3) 
C35 0.044(3) 0.041(3) 0.033(3) -0.007(2) 0.006(2) -0.011(2) 
C36 0.024(2) 0.034(3) 0.029(2) 0.004(2) -0.001(2) 0.002(2) 
C37 0.040(3) 0.042(3) 0.044(3) 0.005(3) 0.004(2) -0.009(2) 
C38 0.043(3) 0.052(4) 0.026(2) 0.004(3) -0.004(2) -0.009(3) 
C39 0.047(3) 0.051(3) 0.036(3) 0.009(3) 0.000(2) 0.001(3) 
C40 0.072(4) 0.106(6) 0.058(4) 0.000(4) -0.009(4) -0.027(4) 
C41 0.076(4) 0.103(6) 0.036(3) 0.008(4) 0.012(3) -0.039(4) 
C42 0.094(5) 0.115(7) 0.073(5) -0.016(4) -0.004(4) -0.020(5) 
C43 0.096(5) 0.144(7) 0.049(4) 0.029(4) 0.034(4) 0.082(5) 
C44 0.092(5) 0.168(9) 0.056(4) 0.019(5) 0.039(4) 0.061(6) 
C45 0.132(7) 0.151(8) 0.062(4) 0.013(5) -0.030(5) -0.074(7) 
O9 0.0210(17) 0.051(2) 0.073(2) -0.014(2) 0.0081(16) -0.0038(16) 
C46 0.288(13) 0.064(5) 0.043(4) 0.011(4) 0.043(6) 0.052(7) 
C47 0.404(19) 0.073(6) 0.047(4) 0.017(4) 0.062(7) 0.028(9) 
O10 0.074(3) 0.061(3) 0.045(2) 0.010(2) 0.000(2) -0.028(2) 
C48 0.089(5) 0.089(6) 0.066(4) 0.030(4) 0.011(4) -0.005(4) 
C49 0.164(8) 0.168(9) 0.068(5) -0.003(6) -0.017(5) -0.113(8) 
C50 0.145(10) 0.260(16) 0.099(7) 0.019(9) 0.018(7) -0.045(11) 
C51 0.29(2) 0.185(14) 0.295(18) -0.106(15) 0.174(16) -0.025(13) 
C52 0.073(6) 0.260(17) 0.221(14) 0.019(13) 0.030(8) 0.039(9) 
 
_geom_special_details 
; 
 All esds (except the esd in the dihedral angle between two l.s. planes) 
 are estimated using the full covariance matrix.  The cell esds are taken 
 into account individually in the estimation of esds in distances, angles 
 and torsion angles; correlations between esds in cell parameters are only 
 used when they are defined by crystal symmetry.  An approximate (isotropic) 
 treatment of cell esds is used for estimating esds involving l.s. planes. 
; 
 
loop_ 
 _geom_bond_atom_site_label_1 
 _geom_bond_atom_site_label_2 
 _geom_bond_distance 
 _geom_bond_site_symmetry_2 
 _geom_bond_publ_flag 
O1 C10 1.255(5) . ? 
O2 C20 1.261(5) . ? 
O3 C14 1.408(5) . ? 
O3 H1 0.8400 . ? 
O4 C1 1.439(5) . ? 
O4 H2 0.8400 . ? 
O5 C4 1.412(5) . ? 
O5 H3 0.8400 . ? 
O6 C16 1.447(5) . ? 
O6 H4 0.8400 . ? 
N1 C9 1.508(5) . ? 
N1 H64 1.0330 . ? 
N1 H65 1.0330 . ? 
N1 H66 1.0330 . ? 
O7 C10 1.259(5) . ? 
C1 C10 1.526(6) . ? 
C1 C13 1.530(5) . ? 
C1 H5 1.0000 . ? 
N2 C2 1.507(5) . ? 
N2 H6 0.96(5) . ? 
N2 H7 0.87(5) . ? 
N2 H8 1.14(6) . ? 
C2 C19 1.501(6) . ? 
C2 C14 1.540(6) . ? 
C2 H9 1.0000 . ? 
O8 C49 1.415(7) . ? 
O8 H10 0.8400 . ? 
C3 C6 1.383(6) . ? 
C3 C15 1.398(6) . ? 
C3 H11 0.9500 . ? 
C4 C7 1.530(6) . ? 
C4 C9 1.537(6) . ? 
C4 H12 1.0000 . ? 
C5 C35 1.375(6) . ? 
C5 C13 1.397(6) . ? 
C5 H13 0.9500 . ? 
C6 C32 1.385(6) . ? 
C6 C9 1.511(5) . ? 
C7 C36 1.391(6) . ? 
C7 C30 1.393(6) . ? 
C8 C23 1.371(6) . ? 
C8 C19 1.378(6) . ? 
C8 H14 0.9500 . ? 
C9 H15 1.0000 . ? 
C11 C28 1.378(6) . ? 
C11 C13 1.400(6) . ? 
C11 H16 0.9500 . ? 
C12 C37 1.363(6) . ? 
C12 C33 1.387(6) . ? 
C12 C14 1.517(6) . ? 
C14 H17 1.0000 . ? 
C15 C27 1.375(6) . ? 
C15 H18 0.9500 . ? 
C16 C20 1.497(6) . ? 
C16 C22 1.512(6) . ? 
C16 H19 1.0000 . ? 
C17 C36 1.369(6) . ? 
C17 C31 1.385(7) . ? 
C17 H20 0.9500 . ? 
C18 C27 1.369(7) . ? 
C18 C32 1.406(6) . ? 
C18 H21 0.9500 . ? 
C19 C25 1.397(6) . ? 
C20 O9 1.281(5) . ? 
C21 C24 1.376(7) . ? 
C21 C23 1.377(7) . ? 
C21 H22 0.9500 . ? 
C22 C46 1.321(8) . ? 
C22 C43 1.328(8) . ? 
C23 H23 0.9500 . ? 
C24 C25 1.384(6) . ? 
C24 H24 0.9500 . ? 
C25 H25 0.9500 . ? 
C26 C31 1.376(7) . ? 
C26 C30 1.384(6) . ? 
C26 H26 0.9500 . ? 
C27 H27 0.9500 . ? 
C28 C38 1.367(7) . ? 
C28 H28 0.9500 . ? 
C29 C34 1.366(8) . ? 
C29 C39 1.382(7) . ? 
C29 H29 0.9500 . ? 
C30 H30 0.9500 . ? 
C31 H31 0.9500 . ? 
C32 H32 0.9500 . ? 
C33 C34 1.395(6) . ? 
C33 H33 0.9500 . ? 
C34 H34 0.9500 . ? 
C35 C38 1.387(7) . ? 
C35 H35 0.9500 . ? 
C36 H36 0.9500 . ? 
C37 C39 1.387(6) . ? 
C37 H37 0.9500 . ? 
C38 H38 0.9500 . ? 
C39 H39 0.9500 . ? 
C40 C49 1.388(9) . ? 
C40 C45 1.403(8) . ? 
C40 H40 0.9900 . ? 
C40 H41 0.9900 . ? 
C41 C44 1.325(10) . ? 
C41 C47 1.342(11) . ? 
C41 H42 0.9500 . ? 
C42 C45 1.454(10) . ? 
C42 H43 0.9800 . ? 
C42 H44 0.9800 . ? 
C42 H45 0.9800 . ? 
C43 C44 1.412(8) . ? 
C43 H46 0.9500 . ? 
C44 H47 0.9500 . ? 
C45 H48 0.9900 . ? 
C45 H49 0.9900 . ? 
C46 C47 1.390(10) . ? 
C46 H50 0.9500 . ? 
C47 H51 0.9500 . ? 
O10 C48 1.440(6) . ? 
O10 H52 0.8400 . ? 
C48 C50 1.459(11) . ? 
C48 H53 0.9900 . ? 
C48 H54 0.9900 . ? 
C49 H55 0.9900 . ? 
C49 H56 0.9900 . ? 
C50 C52 1.425(14) . ? 
C50 H57 0.9900 . ? 
C50 H58 0.9900 . ? 
C51 C52 1.437(17) . ? 
C51 H59 0.9800 . ? 
C51 H60 0.9800 . ? 
C51 H61 0.9800 . ? 
C52 H62 0.9900 . ? 
C52 H63 0.9900 . ? 
 
loop_ 
 _geom_angle_atom_site_label_1 
 _geom_angle_atom_site_label_2 
 _geom_angle_atom_site_label_3 
 _geom_angle 
 _geom_angle_site_symmetry_1 
 _geom_angle_site_symmetry_3 
 _geom_angle_publ_flag 
C14 O3 H1 109.5 . . ? 
C1 O4 H2 109.5 . . ? 
C4 O5 H3 109.5 . . ? 
C16 O6 H4 109.5 . . ? 
C9 N1 H64 109.5 . . ? 
C9 N1 H65 109.5 . . ? 
H64 N1 H65 109.5 . . ? 
C9 N1 H66 109.5 . . ? 
H64 N1 H66 109.5 . . ? 
H65 N1 H66 109.5 . . ? 
O4 C1 C10 110.4(3) . . ? 
O4 C1 C13 107.8(3) . . ? 
C10 C1 C13 112.0(3) . . ? 
O4 C1 H5 108.8 . . ? 
C10 C1 H5 108.8 . . ? 
C13 C1 H5 108.8 . . ? 
C2 N2 H6 104(3) . . ? 
C2 N2 H7 107(3) . . ? 
H6 N2 H7 118(4) . . ? 
C2 N2 H8 110(3) . . ? 
H6 N2 H8 91(4) . . ? 
H7 N2 H8 125(4) . . ? 
C19 C2 N2 111.7(3) . . ? 
C19 C2 C14 114.1(4) . . ? 
N2 C2 C14 107.5(4) . . ? 
C19 C2 H9 107.8 . . ? 
N2 C2 H9 107.8 . . ? 
C14 C2 H9 107.8 . . ? 
C49 O8 H10 109.5 . . ? 
C6 C3 C15 120.3(4) . . ? 
C6 C3 H11 119.8 . . ? 
C15 C3 H11 119.8 . . ? 
O5 C4 C7 109.8(4) . . ? 
O5 C4 C9 112.0(4) . . ? 
C7 C4 C9 109.1(3) . . ? 
O5 C4 H12 108.6 . . ? 
C7 C4 H12 108.6 . . ? 
C9 C4 H12 108.6 . . ? 
C35 C5 C13 120.0(4) . . ? 
C35 C5 H13 120.0 . . ? 
C13 C5 H13 120.0 . . ? 
C3 C6 C32 119.2(4) . . ? 
C3 C6 C9 119.0(4) . . ? 
C32 C6 C9 121.8(4) . . ? 
C36 C7 C30 118.6(4) . . ? 
C36 C7 C4 121.2(4) . . ? 
C30 C7 C4 120.1(4) . . ? 
C23 C8 C19 121.5(5) . . ? 
C23 C8 H14 119.2 . . ? 
C19 C8 H14 119.2 . . ? 
N1 C9 C6 110.1(3) . . ? 
N1 C9 C4 110.0(3) . . ? 
C6 C9 C4 114.3(3) . . ? 
N1 C9 H15 107.4 . . ? 
C6 C9 H15 107.4 . . ? 
C4 C9 H15 107.4 . . ? 
O1 C10 O7 125.5(4) . . ? 
O1 C10 C1 119.2(4) . . ? 
O7 C10 C1 115.3(4) . . ? 
C28 C11 C13 120.7(5) . . ? 
C28 C11 H16 119.7 . . ? 
C13 C11 H16 119.7 . . ? 
C37 C12 C33 119.0(4) . . ? 
C37 C12 C14 120.4(4) . . ? 
C33 C12 C14 120.6(4) . . ? 
C5 C13 C11 118.8(4) . . ? 
C5 C13 C1 123.1(4) . . ? 
C11 C13 C1 118.1(4) . . ? 
O3 C14 C12 112.1(4) . . ? 
O3 C14 C2 110.0(4) . . ? 
C12 C14 C2 110.9(3) . . ? 
O3 C14 H17 107.9 . . ? 
C12 C14 H17 107.9 . . ? 
C2 C14 H17 107.9 . . ? 
C27 C15 C3 120.1(4) . . ? 
C27 C15 H18 119.9 . . ? 
C3 C15 H18 119.9 . . ? 
O6 C16 C20 110.6(4) . . ? 
O6 C16 C22 108.2(3) . . ? 
C20 C16 C22 113.2(4) . . ? 
O6 C16 H19 108.2 . . ? 
C20 C16 H19 108.2 . . ? 
C22 C16 H19 108.2 . . ? 
C36 C17 C31 120.1(4) . . ? 
C36 C17 H20 120.0 . . ? 
C31 C17 H20 120.0 . . ? 
C27 C18 C32 120.1(5) . . ? 
C27 C18 H21 120.0 . . ? 
C32 C18 H21 120.0 . . ? 
C8 C19 C25 117.8(4) . . ? 
C8 C19 C2 119.5(4) . . ? 
C25 C19 C2 122.7(4) . . ? 
O2 C20 O9 122.8(4) . . ? 
O2 C20 C16 121.0(4) . . ? 
O9 C20 C16 116.3(4) . . ? 
C24 C21 C23 119.1(4) . . ? 
C24 C21 H22 120.4 . . ? 
C23 C21 H22 120.4 . . ? 
C46 C22 C43 117.3(5) . . ? 
C46 C22 C16 120.9(5) . . ? 
C43 C22 C16 121.8(5) . . ? 
C8 C23 C21 120.6(5) . . ? 
C8 C23 H23 119.7 . . ? 
C21 C23 H23 119.7 . . ? 
C21 C24 C25 120.4(5) . . ? 
C21 C24 H24 119.8 . . ? 
C25 C24 H24 119.8 . . ? 
C24 C25 C19 120.6(4) . . ? 
C24 C25 H25 119.7 . . ? 
C19 C25 H25 119.7 . . ? 
C31 C26 C30 120.8(5) . . ? 
C31 C26 H26 119.6 . . ? 
C30 C26 H26 119.6 . . ? 
C18 C27 C15 120.2(4) . . ? 
C18 C27 H27 119.9 . . ? 
C15 C27 H27 119.9 . . ? 
C38 C28 C11 119.5(5) . . ? 
C38 C28 H28 120.2 . . ? 
C11 C28 H28 120.2 . . ? 
C34 C29 C39 119.8(5) . . ? 
C34 C29 H29 120.1 . . ? 
C39 C29 H29 120.1 . . ? 
C26 C30 C7 119.9(5) . . ? 
C26 C30 H30 120.1 . . ? 
C7 C30 H30 120.1 . . ? 
C26 C31 C17 119.5(4) . . ? 
C26 C31 H31 120.2 . . ? 
C17 C31 H31 120.2 . . ? 
C6 C32 C18 120.1(4) . . ? 
C6 C32 H32 120.0 . . ? 
C18 C32 H32 120.0 . . ? 
C12 C33 C34 119.4(5) . . ? 
C12 C33 H33 120.3 . . ? 
C34 C33 H33 120.3 . . ? 
C29 C34 C33 120.9(5) . . ? 
C29 C34 H34 119.5 . . ? 
C33 C34 H34 119.5 . . ? 
C5 C35 C38 120.0(5) . . ? 
C5 C35 H35 120.0 . . ? 
C38 C35 H35 120.0 . . ? 
C17 C36 C7 121.2(4) . . ? 
C17 C36 H36 119.4 . . ? 
C7 C36 H36 119.4 . . ? 
C12 C37 C39 121.9(5) . . ? 
C12 C37 H37 119.0 . . ? 
C39 C37 H37 119.0 . . ? 
C28 C38 C35 121.0(4) . . ? 
C28 C38 H38 119.5 . . ? 
C35 C38 H38 119.5 . . ? 
C29 C39 C37 119.0(5) . . ? 
C29 C39 H39 120.5 . . ? 
C37 C39 H39 120.5 . . ? 
C49 C40 C45 122.1(7) . . ? 
C49 C40 H40 106.8 . . ? 
C45 C40 H40 106.8 . . ? 
C49 C40 H41 106.8 . . ? 
C45 C40 H41 106.8 . . ? 
H40 C40 H41 106.6 . . ? 
C44 C41 C47 118.9(6) . . ? 
C44 C41 H42 120.6 . . ? 
C47 C41 H42 120.6 . . ? 
C45 C42 H43 109.5 . . ? 
C45 C42 H44 109.5 . . ? 
H43 C42 H44 109.5 . . ? 
C45 C42 H45 109.5 . . ? 
H43 C42 H45 109.5 . . ? 
H44 C42 H45 109.5 . . ? 
C22 C43 C44 121.2(7) . . ? 
C22 C43 H46 119.4 . . ? 
C44 C43 H46 119.4 . . ? 
C41 C44 C43 120.3(7) . . ? 
C41 C44 H47 119.9 . . ? 
C43 C44 H47 119.9 . . ? 
C40 C45 C42 121.8(7) . . ? 
C40 C45 H48 106.9 . . ? 
C42 C45 H48 106.9 . . ? 
C40 C45 H49 106.9 . . ? 
C42 C45 H49 106.9 . . ? 
H48 C45 H49 106.7 . . ? 
C22 C46 C47 123.0(8) . . ? 
C22 C46 H50 118.5 . . ? 
C47 C46 H50 118.5 . . ? 
C41 C47 C46 119.3(8) . . ? 
C41 C47 H51 120.3 . . ? 
C46 C47 H51 120.3 . . ? 
C48 O10 H52 109.5 . . ? 
O10 C48 C50 115.3(6) . . ? 
O10 C48 H53 108.5 . . ? 
C50 C48 H53 108.5 . . ? 
O10 C48 H54 108.5 . . ? 
C50 C48 H54 108.5 . . ? 
H53 C48 H54 107.5 . . ? 
C40 C49 O8 117.6(7) . . ? 
C40 C49 H55 107.9 . . ? 
O8 C49 H55 107.9 . . ? 
C40 C49 H56 107.9 . . ? 
O8 C49 H56 107.9 . . ? 
H55 C49 H56 107.2 . . ? 
C52 C50 C48 120.0(13) . . ? 
C52 C50 H57 107.3 . . ? 
C48 C50 H57 107.3 . . ? 
C52 C50 H58 107.3 . . ? 
C48 C50 H58 107.3 . . ? 
H57 C50 H58 106.9 . . ? 
C52 C51 H59 109.5 . . ? 
C52 C51 H60 109.5 . . ? 
H59 C51 H60 109.5 . . ? 
C52 C51 H61 109.5 . . ? 
H59 C51 H61 109.5 . . ? 
H60 C51 H61 109.5 . . ? 
C50 C52 C51 115.1(13) . . ? 
C50 C52 H62 108.5 . . ? 
C51 C52 H62 108.5 . . ? 
C50 C52 H63 108.5 . . ? 
C51 C52 H63 108.5 . . ? 
H62 C52 H63 107.5 . . ? 
 
loop_ 
 _geom_torsion_atom_site_label_1 
 _geom_torsion_atom_site_label_2 
 _geom_torsion_atom_site_label_3 
 _geom_torsion_atom_site_label_4 
 _geom_torsion 
 _geom_torsion_site_symmetry_1 
 _geom_torsion_site_symmetry_2 
 _geom_torsion_site_symmetry_3 
 _geom_torsion_site_symmetry_4 
 _geom_torsion_publ_flag 
C15 C3 C6 C32 0.1(6) . . . . ? 
C15 C3 C6 C9 179.8(4) . . . . ? 
O5 C4 C7 C36 -17.1(5) . . . . ? 
C9 C4 C7 C36 106.0(4) . . . . ? 
O5 C4 C7 C30 166.1(4) . . . . ? 
C9 C4 C7 C30 -70.9(5) . . . . ? 
C3 C6 C9 N1 -125.2(4) . . . . ? 
C32 C6 C9 N1 54.5(5) . . . . ? 
C3 C6 C9 C4 110.4(5) . . . . ? 
C32 C6 C9 C4 -69.9(5) . . . . ? 
O5 C4 C9 N1 -67.6(4) . . . . ? 
C7 C4 C9 N1 170.7(3) . . . . ? 
O5 C4 C9 C6 56.8(5) . . . . ? 
C7 C4 C9 C6 -64.9(5) . . . . ? 
O4 C1 C10 O1 -27.9(5) . . . . ? 
C13 C1 C10 O1 92.4(4) . . . . ? 
O4 C1 C10 O7 152.5(3) . . . . ? 
C13 C1 C10 O7 -87.3(4) . . . . ? 
C35 C5 C13 C11 0.4(6) . . . . ? 
C35 C5 C13 C1 -178.2(4) . . . . ? 
C28 C11 C13 C5 -1.4(6) . . . . ? 
C28 C11 C13 C1 177.3(4) . . . . ? 
O4 C1 C13 C5 116.8(4) . . . . ? 
C10 C1 C13 C5 -4.9(5) . . . . ? 
O4 C1 C13 C11 -61.8(5) . . . . ? 
C10 C1 C13 C11 176.5(4) . . . . ? 
C37 C12 C14 O3 165.3(4) . . . . ? 
C33 C12 C14 O3 -15.9(6) . . . . ? 
C37 C12 C14 C2 -71.4(5) . . . . ? 
C33 C12 C14 C2 107.4(4) . . . . ? 
C19 C2 C14 O3 56.6(5) . . . . ? 
N2 C2 C14 O3 -67.9(4) . . . . ? 
C19 C2 C14 C12 -68.0(5) . . . . ? 
N2 C2 C14 C12 167.5(4) . . . . ? 
C6 C3 C15 C27 0.3(6) . . . . ? 
C23 C8 C19 C25 0.2(7) . . . . ? 
C23 C8 C19 C2 -178.9(4) . . . . ? 
N2 C2 C19 C8 -131.0(4) . . . . ? 
C14 C2 C19 C8 106.8(5) . . . . ? 
N2 C2 C19 C25 50.0(6) . . . . ? 
C14 C2 C19 C25 -72.2(5) . . . . ? 
O6 C16 C20 O2 -24.6(6) . . . . ? 
C22 C16 C20 O2 97.1(5) . . . . ? 
O6 C16 C20 O9 155.1(4) . . . . ? 
C22 C16 C20 O9 -83.3(5) . . . . ? 
O6 C16 C22 C46 -106.2(7) . . . . ? 
C20 C16 C22 C46 130.8(7) . . . . ? 
O6 C16 C22 C43 74.7(6) . . . . ? 
C20 C16 C22 C43 -48.3(7) . . . . ? 
C19 C8 C23 C21 0.7(7) . . . . ? 
C24 C21 C23 C8 -0.5(7) . . . . ? 
C23 C21 C24 C25 -0.5(7) . . . . ? 
C21 C24 C25 C19 1.4(7) . . . . ? 
C8 C19 C25 C24 -1.2(6) . . . . ? 
C2 C19 C25 C24 177.9(4) . . . . ? 
C32 C18 C27 C15 -0.3(7) . . . . ? 
C3 C15 C27 C18 -0.2(7) . . . . ? 
C13 C11 C28 C38 2.4(7) . . . . ? 
C31 C26 C30 C7 0.2(6) . . . . ? 
C36 C7 C30 C26 0.4(6) . . . . ? 
C4 C7 C30 C26 177.4(4) . . . . ? 
C30 C26 C31 C17 -0.7(7) . . . . ? 
C36 C17 C31 C26 0.5(7) . . . . ? 
C3 C6 C32 C18 -0.6(6) . . . . ? 
C9 C6 C32 C18 179.7(4) . . . . ? 
C27 C18 C32 C6 0.7(6) . . . . ? 
C37 C12 C33 C34 0.8(7) . . . . ? 
C14 C12 C33 C34 -178.1(4) . . . . ? 
C39 C29 C34 C33 1.0(8) . . . . ? 
C12 C33 C34 C29 -1.1(7) . . . . ? 
C13 C5 C35 C38 -0.4(7) . . . . ? 
C31 C17 C36 C7 0.2(6) . . . . ? 
C30 C7 C36 C17 -0.6(6) . . . . ? 
C4 C7 C36 C17 -177.5(4) . . . . ? 
C33 C12 C37 C39 -0.3(7) . . . . ? 
C14 C12 C37 C39 178.5(4) . . . . ? 
C11 C28 C38 C35 -2.5(7) . . . . ? 
C5 C35 C38 C28 1.5(7) . . . . ? 
C34 C29 C39 C37 -0.6(7) . . . . ? 
C12 C37 C39 C29 0.2(7) . . . . ? 
C46 C22 C43 C44 2.6(11) . . . . ? 
C16 C22 C43 C44 -178.2(6) . . . . ? 
C47 C41 C44 C43 -3.0(13) . . . . ? 
C22 C43 C44 C41 0.0(12) . . . . ? 
C49 C40 C45 C42 177.5(9) . . . . ? 
C43 C22 C46 C47 -2.3(14) . . . . ? 
C16 C22 C46 C47 178.6(9) . . . . ? 
C44 C41 C47 C46 3.4(16) . . . . ? 
C22 C46 C47 C41 -0.7(18) . . . . ? 
C45 C40 C49 O8 176.0(8) . . . . ? 
O10 C48 C50 C52 60.1(13) . . . . ? 
C48 C50 C52 C51 69.9(16) . . . . ? 
 
_diffrn_measured_fraction_theta_max    0.994 
_diffrn_reflns_theta_full              25.00 
_diffrn_measured_fraction_theta_full   0.994 
_refine_diff_density_max    0.370 
_refine_diff_density_min   -0.289 
_refine_diff_density_rms    0.066 

# start Validation Reply Form
_vrf_PLAT241_S-1_1R,2S-2_1-BuOH
;
PROBLEM: Check  High      Ueq as Compared to Neighbors for        C47      
RESPONSE: This is due to the disordered structure of (S)-1.
;
# end Validation Reply Form
